# Supplementary material
Source: publisher site journal article supplement (https://www.dovepress.com/article/274563)
Supplement: Supplementary file 1 [file get_supplementary_file.php]

**Supplementary materials**

**A  $K_{Ca}3.1$  channel opener, ASP0819, modulates nociceptive signal processing from peripheral nerves in fibromyalgia-like pain in rats**

Nobuaki Takeshita<sup>1\*</sup>, Tomoya Oe<sup>1</sup>, Tetsuo Kiso<sup>1</sup>, and Shuichiro Kakimoto<sup>1</sup>

<sup>1</sup>Drug Discovery Research, Astellas Pharma Inc., Tsukuba, Japan

Correspondence:

Nobuaki Takeshita, PhD

Drug Discovery Research

Astellas Pharma Inc.

21 Miyukigaoka, Tsukuba, Ibaraki 305-8585, Japan

Telephone number: +81-29-852-1111

Fax number: +81-29-850-5120

E-mail: [nobuaki.takeshita@astellas.com](mailto:nobuaki.takeshita@astellas.com)

## Supplemental Table 1

### Inhibitory effect of ASP0819 on radioligand binding to various receptors, ion channels, transporters

| Assay name                                 | Inhibition (%) |                            |
|--------------------------------------------|----------------|----------------------------|
|                                            | ASP0819        | Positive substance         |
| Adenosine A1 (Rat)                         | 3.72           | 100.00 (DPCPX)             |
| α1-Adrenergic (Non-selective) (Rat)        | 6.59           | 100.00 (Prazosin)          |
| α2-Adrenergic (Non-selective) (Rat)        | 26.41          | 100.00 (Yohimbine)         |
| β-Adrenergic (Non-selective) (Rat)         | 9.02           | 97.95 (Propranolol)        |
| Angiotensin AT1 (Human)                    | 0.00           | 100.00 (Angiotensin II)    |
| Angiotensin AT2 (Mouse)                    | 0.66           | 100.00 (Angiotensin II)    |
| Bradykinin B2 (Human)                      | 8.05           | 96.05 (HOE140)             |
| Ca channel (Type L, Dihydropyridine) (Rat) | 9.25           | 100.00 (Nitrendipine)      |
| Ca channel (Type N) (Rat)                  | 0.66           | 100.00 (ω-Conotoxin)       |
| CCK A (Human)                              | 0.00           | 99.32 (CCK-8 sulfated)     |
| CCK B (Human)                              | 2.28           | 100.00 (CCK-8 sulfated)    |
| CRF1 (Human)                               | 4.96           | 100.00 (Urocortin human)   |
| Dopamine D1 (Rat)                          | 1.77           | 99.95 (SCH23390)           |
| Dopamine D2 short (Human)                  | 0.00           | 98.85 ((+)-Butaclamol)     |
| Dopamine transporter (Human)               | 30.09          | 100.00 (GBR12909)          |
| Estrogen (Rat)                             | 1.72           | 99.70 (β-Estradiol)        |
| Endothelin ETA (Human)                     | 0.00           | 100.00 (Endothelin-1)      |
| Endothelin ETB (Human)                     | 1.91           | 99.92 (Endothelin-1)       |
| GABA A (Agonist site) (Rat)                | 1.01           | 100.00 (Muscimol)          |
| GABA A (BZ central) (Rat)                  | 0.27           | 100.00 (Diazepam)          |
| GABA B (Rat)                               | 16.61          | 100.00 (GABA)              |
| Glutamate (AMPA) (Rat)                     | 0.00           | 99.06 (AMPA)               |
| Glutamate (Kainate) (Rat)                  | 4.32           | 100.00 (Kainic acid)       |
| Glutamate (NMDA agonist site) (Rat)        | 0.00           | 99.07 (Glutamic acid)      |
| Glutamate (NMDA glycine site) (Rat)        | 0.00           | 100.00 (MDL105519)         |
| Glycine (Strychnine sensitive) (Rat)       | 28.20          | 100.00 (Strychnine)        |
| Histamine H1 (Central) (Guinea pig)        | 6.50           | 100.00 (Pyrilamine)        |
| Histamine H2 (Rat)                         | 15.21          | 99.79 (Cimetidine)         |
| Histamine H3 (Rat)                         | 3.94           | 96.14 (α-Methyl histamine) |

Test substance concentration: 10 μM; positive substance concentration: 1 μM for HOE140, urocortin human and endothelin-1, or 10 μM for all others. Data are expressed as the mean of duplicate samples. The inhibition rate was calculated from “100 – binding ratio.”

$$\text{Binding ratio: } [(B - N)/(B_0 - N)] \times 100 (\%)$$

B: Total bound radioactivity in the presence of the test substance (individual value)

$B_0$ : Total bound radioactivity in the absence of the test substance (mean value)

N: Non-specific bound radioactivity (mean value)

**Supplemental Table 2****Inhibitory effect of ASP0819 on radioligand binding to various receptors, ion channels, transporters**

| Assay name                           | Inhibition (%) |                                         |
|--------------------------------------|----------------|-----------------------------------------|
|                                      | ASP0819        | Positive substance                      |
| K channel KATP (Rat)                 | 0.00           | 98.06 (Glibenclamide)                   |
| K channel SkCa (Rat)                 | 1.18           | 98.99 (Apamin)                          |
| Leukotriene B4 (Guinea pig)          | 15.60          | 100.00 (Leukotriene B <sub>4</sub> )    |
| Leukotriene D4 (Guinea pig)          | 0.00           | 100.00 (Leukotriene D <sub>4</sub> )    |
| Melatonin MT1 (Human)                | 0.83           | 99.64 (Melatonin)                       |
| Muscarinic (Non-selective) (Rat)     | 2.14           | 99.92 (Atropine)                        |
| Muscarinic M1 (Human)                | 6.15           | 100.00 (Atropine)                       |
| Muscarinic M2 (Human)                | 2.86           | 100.00 (Atropine)                       |
| Na channel Site 2 (Rat)              | 83.71          | 100.00 (Dibucaine)                      |
| Neurokinin NK1 (Human)               | 25.32          | 100.00 (L-703,606)                      |
| Neurokinin NK2 (Human)               | 20.11          | 100.00 (Neurokinin A)                   |
| Neurokinin NK3 (Human)               | 6.46           | 97.47 (Senktide)                        |
| Norepinephrine transporter (Human)   | 15.35          | 98.90 (Desipramine)                     |
| Nicotinic Ni (Rat)                   | 1.36           | 100.00 (Nicotine)                       |
| Opiate (Non-selective) (Rat)         | 5.52           | 100.00 (Naloxone)                       |
| Opiate $\mu$ (Human)                 | 9.86           | 100.00 (DAMGO)                          |
| Oxytocin (Rat)                       | 8.68           | 99.39 (Oxytocin)                        |
| PAF (Rabbit)                         | 2.24           | 100.00 (PAF)                            |
| Serotonin 5HT1 (Non-selective) (Rat) | 10.89          | 100.00 (Serotonin)                      |
| Serotonin 5HT2B (Human)              | 25.84          | 100.00 (Serotonin)                      |
| Serotonin transporter (Human)        | 13.38          | 100.00 (Imipramine)                     |
| Sigma (Non-selective) (Guinea pig)   | 57.57          | 92.60 (Haloperidol)                     |
| Testosterone (Human)                 | 0.00           | 99.39 (Testosterone)                    |
| Vasopressin V1 (Rat)                 | 2.48           | 95.68 ([Arg <sup>8</sup> ]-Vasopressin) |
| VIP 1 (Human)                        | 0.00           | 100.00 (VIP)                            |
| Histamine H4 (Human)                 | 9.39           | 100.00 (Histamine)                      |
| Serotonin 5HT4 (Guinea pig)          | 73.52          | 100.00 (Serotonin)                      |
| Serotonin 5HT3 (Human)               | 4.13           | 98.31 (MDL72222)                        |

Test substance concentration: 10  $\mu$ M; positive substance concentration: 1  $\mu$ M for leukotriene B<sub>4</sub>, leukotriene D<sub>4</sub> and VIP, or 10  $\mu$ M for all others. Data are expressed as the mean of duplicate samples. The inhibition rate was calculated from “100 – binding ratio.”

$$\text{Binding ratio: } [(B - N)/(B_0 - N)] \times 100 (\%)$$

B: Total bound radioactivity in the presence of the test substance (individual value)

$B_0$ : Total bound radioactivity in the absence of the test substance (mean value)

N: Non-specific bound radioactivity (mean value)

### Supplemental Table 3

#### Inhibitory effect of AS0819 on various enzymes

| Assay name                 | Inhibition (%) |                    |
|----------------------------|----------------|--------------------|
|                            | ASP0819        | Positive substance |
| Acetylcholinesterase (Eel) | 0.68           | 97.59 (Eserine)    |
| MAO-A (Rat)                | 0.00           | 98.35 (Clorgyline) |
| MAO-B (Rat)                | 0.00           | 93.70 (Ro 16-6491) |

Test substance concentration: 10  $\mu$ M; positive substance concentration: 100  $\mu$ M for Ro 16-6491, or 10  $\mu$ M for all others. Data are expressed as the mean of duplicate samples. The inhibition rate was calculated from “100 – reaction ratio.”

Reaction ratio:  $[(B - N)/(B_0 - N)] \times 100$  (%)

B: Radioactivity or fluorescence intensity in the tube for calculation of inhibition rate (individual value)

B<sub>0</sub>: Radioactivity or fluorescence intensity in the tube for calculation of total reaction (mean value)

N: Radioactivity or fluorescence intensity in the tube for calculation of non-specific reaction (mean value)

## Supplemental Figure 1

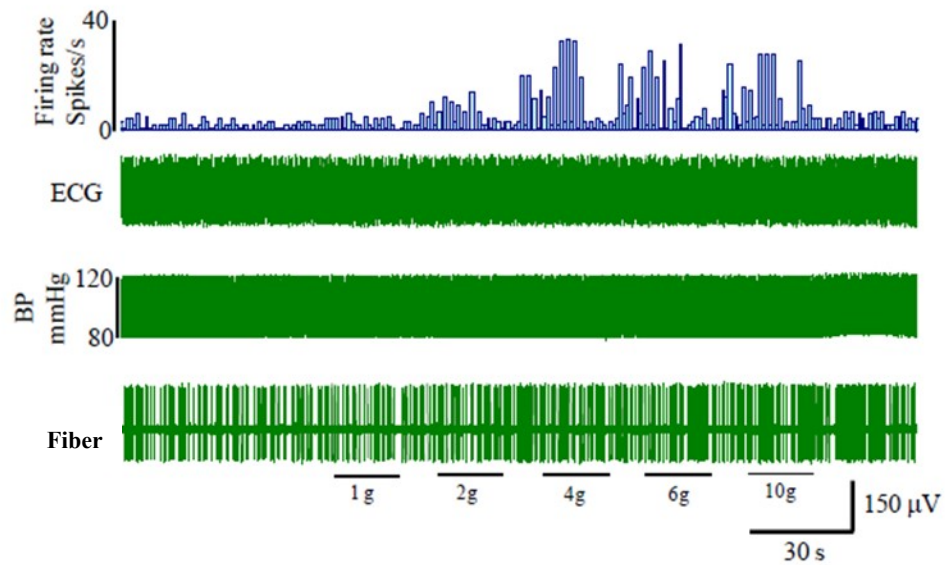

A typical in vivo electrophysiology experiment set-up for dorsal root filament recording. 1g, 2g to 10g: von Frey hair 1 g, 2 g to 10 g, repeated 10 times using a one second-on-one-second-off protocol. ECG: electrocardiogram, BP: blood pressure.

## Supplemental Figure 2

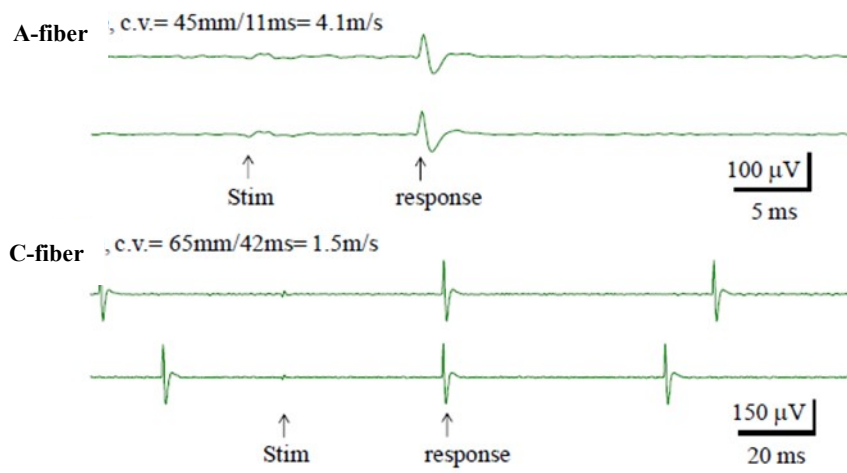

An example of the approach used for identification of fiber categories.



### Supplemental Figure 3

A

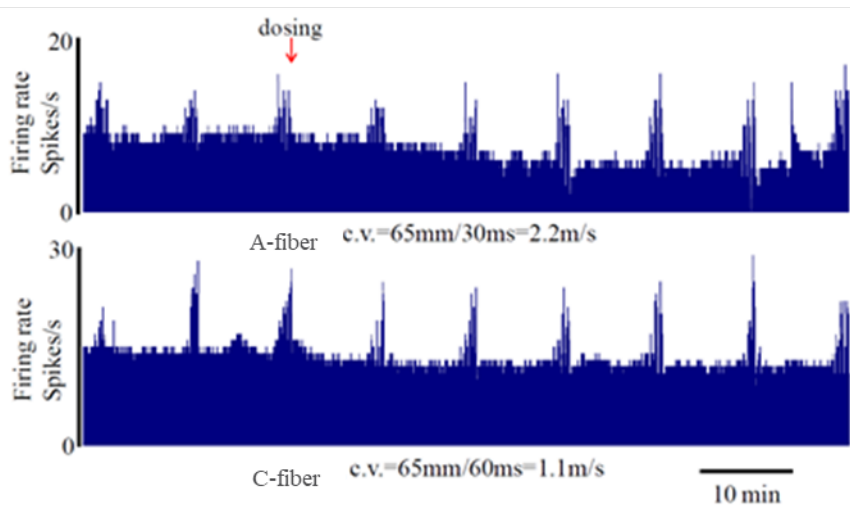

Example recordings on spontaneous activity and mechanically-evoked responses of an A- (upper trace) and C-fiber (lower trace) in RIM models following vehicle perfusion.

B

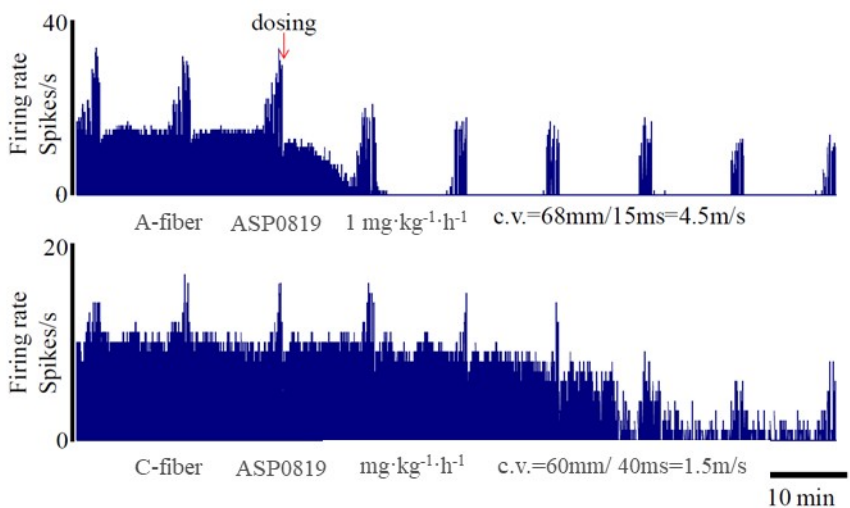

Example recordings on spontaneous activity and mechanically-evoked responses of an A- (upper trace) and C-fiber (lower trace) in RIM models inhibited by ASP0819 at 1 mg·kg<sup>-1</sup>·h<sup>-1</sup>.
